# Supplementary material for: Highly compressible and stretchable superhydrophobic coating inspired by bio-adhesion of marine mussels
Source: Royal Society of Chemistry journal article supplement (doi:10.1039/c4ta01552e), 2014-01-01
Supplement: c4ta01552e1.pdf [file c4ta01552e1.pdf]

## Supporting information

### Highly compressible and stretchable superhydrophobic coating inspired by bio-adhesion of marine mussels

Fatang Liu, Fenghe Sun, Qinmin Pan\*

(School of Chemical Engineering and Technology, Harbin Institute of Technology, Harbin, 150001, *P. R.* China)

Corresponding author:

**Qinmin Pan**

E-mail: [panqm@hit.edu.cn](mailto:panqm@hit.edu.cn)

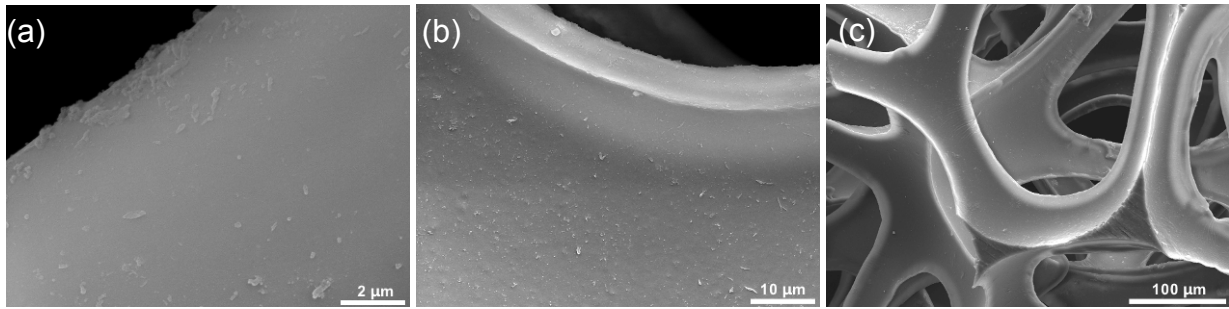

**Fig. S1.** SEM images of the PDA modified sponge.

The PDA-modified sponges showed a rough appearance containing nanoparticles. The nanoparticles results from the self-assembly of dopamine in the polymerization process.<sup>[1]</sup>

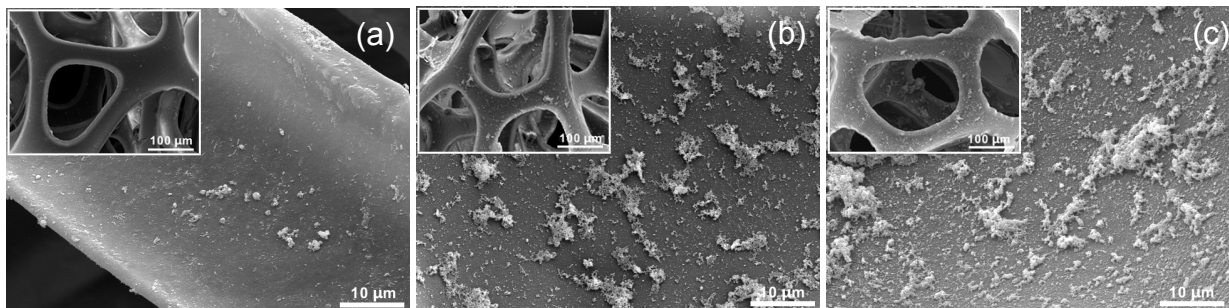

**Fig. S2.** SEM images of superhydrophobic sponges with (a) one, (b) three, and (c) five PDA/Ag bilayers.

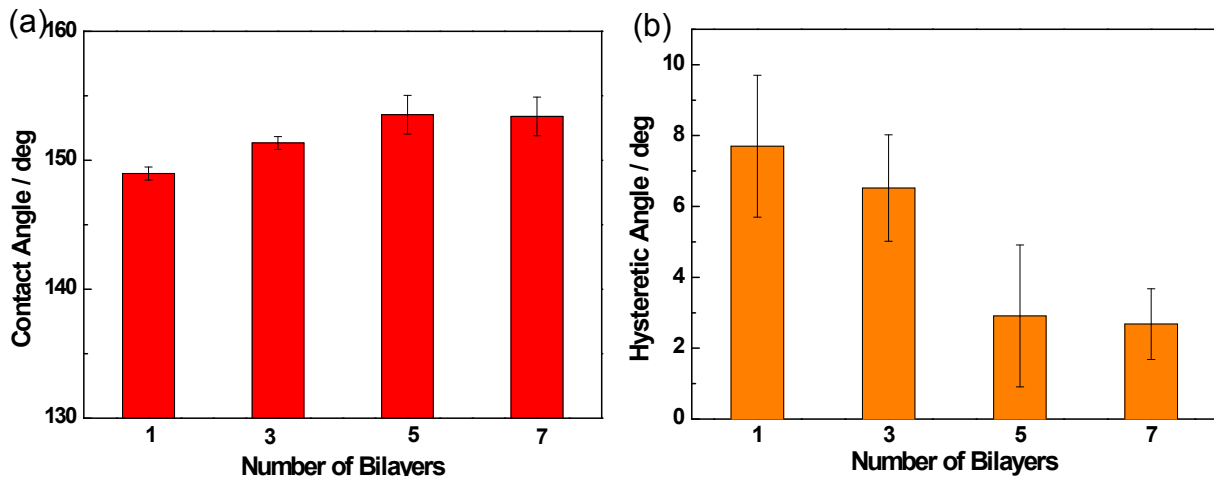

**Fig. S3.** Variation of water contact angle (a) and hysteric angle of (b) the as-prepared sponges with the number of PDA/Ag bilayers.

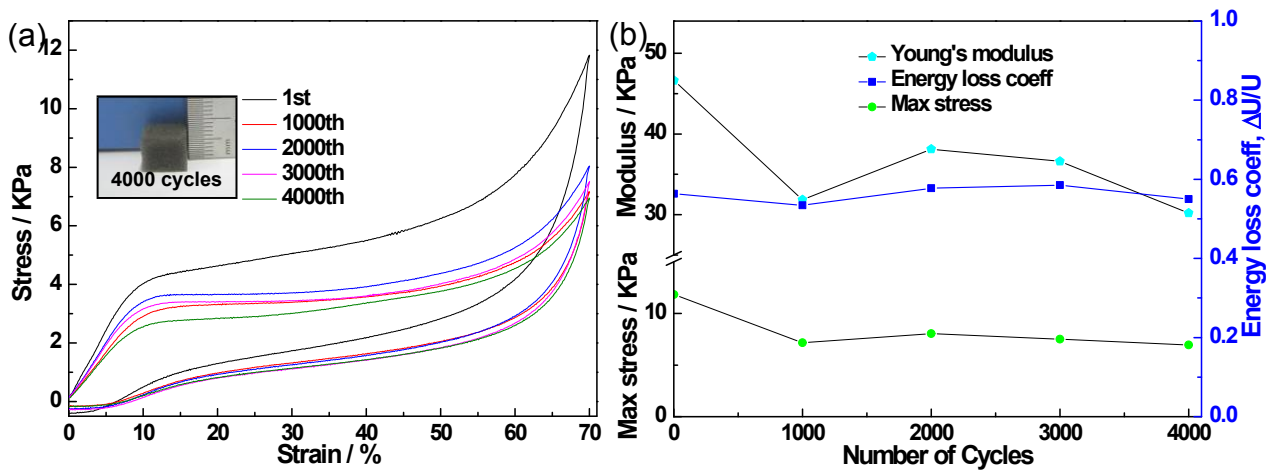

**Fig. S4.** (a) Stress-strain curves of a pristine sponge in the process of 4000-cycle compression. (b) Variation of the maximum stress, Young's modulus and energy loss coefficient with compression cycles. Inset is the optical image of the pristine sponge after 4000-cycle compression.

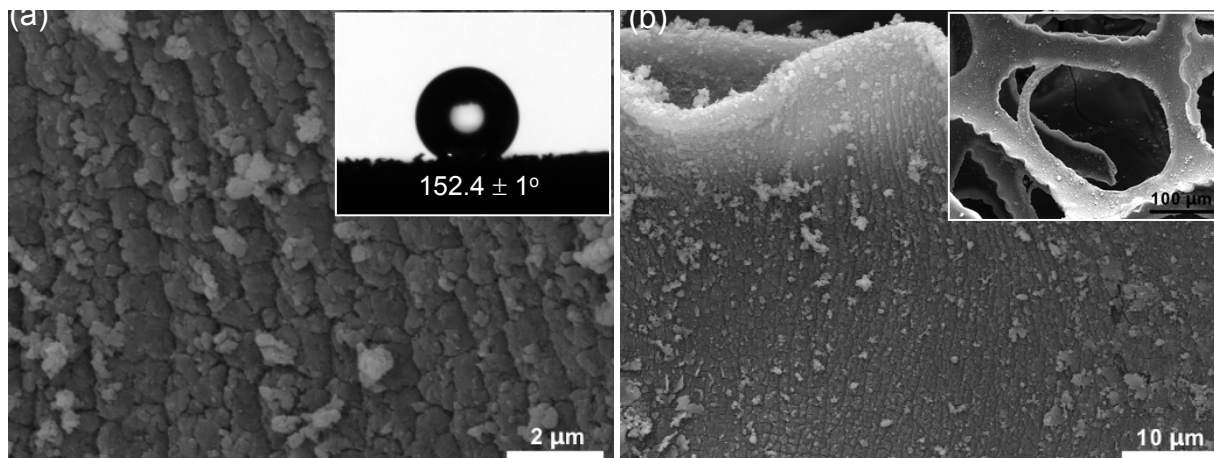

**Fig. S5.** SEM images of the superhydrophobic coating with seven PDA/Ag bilayers after compression for 6000 cycles. Insets are the water contact angle and low magnified SEM image of the corresponding sponge.

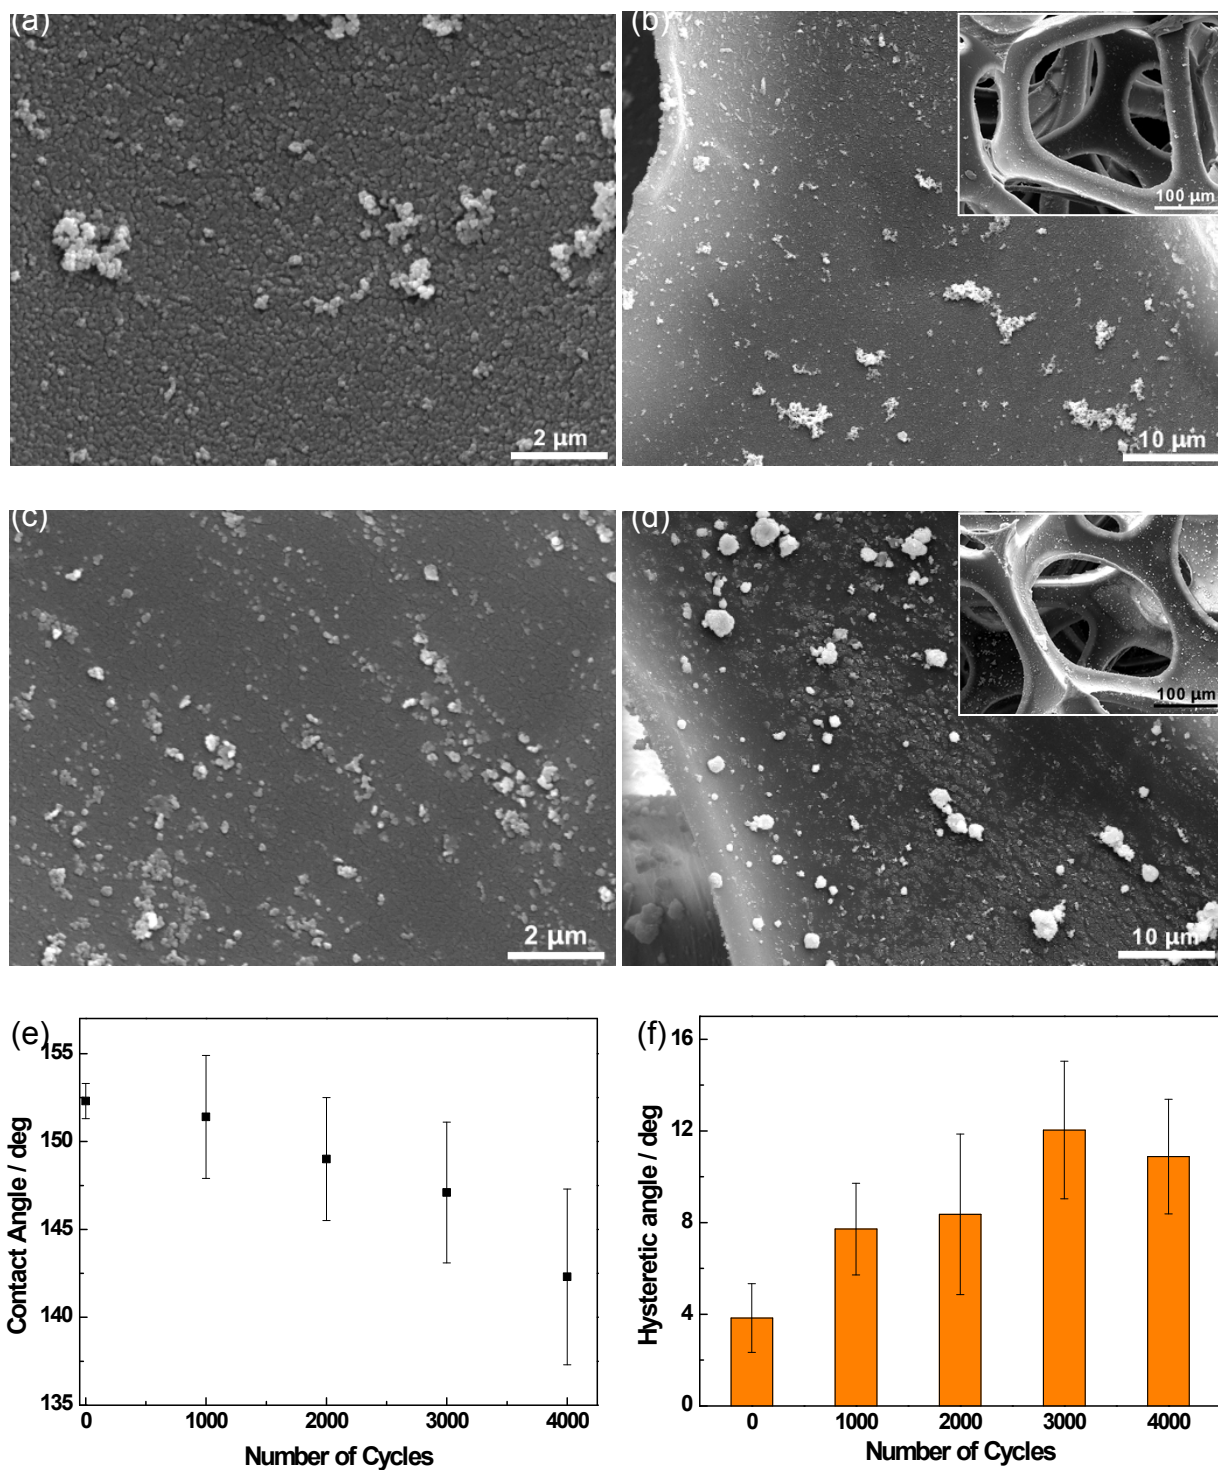

**Fig. S6.** SEM images of the superhydrophobic sponge prepared by electroless deposition before (a, b) and after (c, d) 4000-cycle compression. Variation of the contact angle (e) and hysteric angle (f) of the sponge with compression cycle.

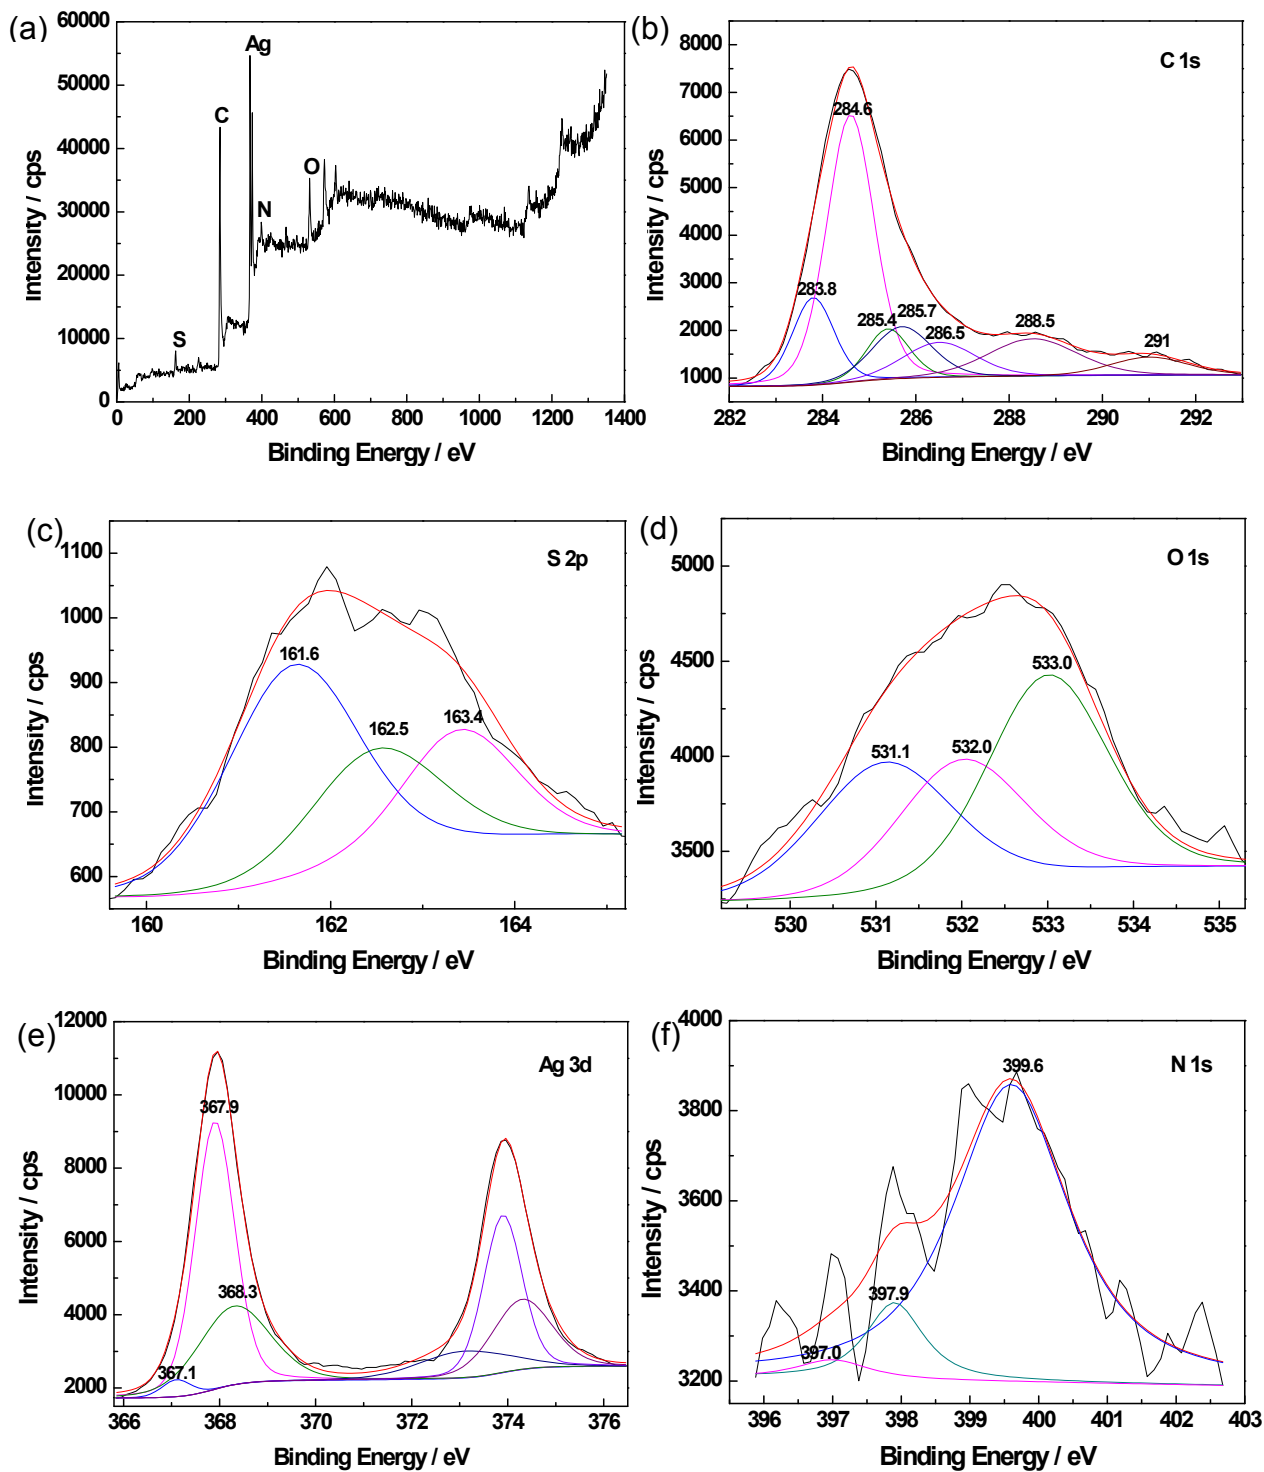

**Fig. S7.** XPS spectra of the superhydrophobic coating coated with 7 bilayers of PDA/Ag; (a) survey scan, (b) C 1s, (c) S 2p, (d) O 1s, (e) Ag 3d, (f) N 1s.

XPS measurements were performed to investigate the chemical interactions between Ag nanoparticles and PDA interlayers (Fig. S7). Fig. S7a shows the elements of C, S, N, O and Ag. The C 1s core spectrum (Fig. S7b) can be

deconvoluted into seven components assigned to the carbon of C=C (283.8 eV), aliphatic C-C (284.6 eV), C-N (285.4 eV), C-O (286.5 eV), C=O (288.5 eV), C-S (285.7 eV) and O-C=O (291.0 eV).<sup>[2-4]</sup> The C-S and O-C=O components originate from *n*-dodecanethiol and PU sponge, respectively, while the C-N, C-O and C=O are attributed to polydopamine layers. In S 2p spectrum (Fig. S7c), peaks ascribed to the sulfur of Ag-S, Ag-S-R (*i.e.*, AgSC<sub>12</sub>H<sub>25</sub>), and free *n*-dodecanethiol (R-SH) are located at 161.6, 162.5 and 163.4 eV, respectively. The appearance of Ag-S-R bond indicates the reaction between *n*-dodecanethiol and silver nanoparticles.<sup>[5]</sup> For O 1s spectrum (Fig. S7d), there is a peak at 532.0 and 533.0 eV, which is assigned to C-O and C=O bonds, respectively. Notably, a peak is also observed at 531.1 eV, which might relate to the interaction of silver with carbonyl group of polydopamine.<sup>[6]</sup> The reason for this assignment is that the interaction between Ag and carbonyl exhibits a significant degree of covalent characteristic, and has a binding energy of ~531.3 eV.<sup>[7,8]</sup> This assignment is also supported by the N 1s and Ag 3d spectra. In Ag 3d spectrum (Fig. S7e), the peaks attributed to Ag (0) and Ag-S bond locate at 367.9 and 367.1 eV, respectively. A new peak at 368.3 eV is ascribed to the Ag atom bound to oxygen-containing group.<sup>[7,8]</sup> Here, we attribute this peak to the chemical interaction of Ag nanoparticles with carbonyl group. The N 1s spectrum has three components at 399.6 eV (R-NH-R or indole groups), 397.9 eV (=N-R) and 397.0 eV (Fig. S7f). The peak at 397.0 eV might associate with the chemical interaction between the N-containing group of polydopamine and Ag nanoparticles.<sup>[9,10]</sup> The component at 399.6 eV suggests the conversion of the primary amine group into to secondary amine caused by the spontaneous polymerization of dopamine.<sup>[4]</sup> The XPS results imply the chemical interactions between the polar functionalities of polydopamine layers and Ag nanoparticles.

## Reference

- 1 S. Hong, Y. S. Na, S. Choi, I. T. Song, W. Y. Kim and H. Lee, *Adv. Funct. Mater.*, 2012, **22**, 4711.
- 2 J. Díaz, G. Paolicelli, S. Ferrer and F. Comin, *Phys. Rev. B.*, 1996, **54**, 8064.
- 3 Q. X. Li, J. Y. Wen, K. G. Neoh, E. T. Kang and D. F. Guo, *Macromolecules*, 2010, **43**, 8336.
- 4 H. C. Gao, Y. M. Sun, J. J. Zhou, R. X and H. W. Duan, *ACS Appl. Mater. Interfaces*, 2013, **5**, 425.
- 5 X. Wu and G. Shi, *J. Phys. Chem. B*, 2006, **110**, 11247.
- 6 T. Strunkus, M. Grunze, G. Kochendoerfer and C. Woll, *Langmuir*, 1996, **12**, 2712.
- 7 L. J. Gerenser, *J. Vac. Sci. Technol. A*, 1990, **8**, 3682.
- 8 J. E. Gray, T. P. R. Norton and K. Griffiths, *Thin Solid Films*, 2005, **484**, 196.
- 9 A. L. Schwaner, E. D. Pylant and J. M. White, *J. Vac. Sci. Technol. A*, 1996, **14**, 1453.
- 10 E. Laksono, A. Galtayries, C. Argile and P. Marcus, *Surf. Sci.*, 2003, **530**, 37.
